# Supplementary material
Source: Research Square preprint supplement (doi:10.21203/rs.3.rs-9499986/v1)
Supplement: Supplementary file 1 [file 05f0e94c70044195967708af.docx]

**Supplementary Information**

Migration wage penalties persist for young women but not young men: evidence from second- and third-generation workers in Germany

**Table A1. Oaxaca–Blinder decomposition of the migration wage gap: full results**

Unconditional quantile regressions at the 25th, 50th, and 75th percentiles of log net hourly wages. SOEP 2013–2023.

|  | **Women** | | | | | | **Men** | | | | | |
| --- | --- | --- | --- | --- | --- | --- | --- | --- | --- | --- | --- | --- |
|  | **All ages** | | | **18–35** | | | **All ages** | | | **18–35** | | |
|  | 25th | 50th | 75th | 25th | 50th | 75th | 25th | 50th | 75th | 25th | 50th | 75th |
| **Difference** | 0.17*** | 0.10 | 0.10 | 0.21*** | 0.11*** | 0.09*** | 0.23*** | 0.16*** | 0.16*** | 0.20 | 0.07 | 0.03 |
| **Explained** | 0.28*** | 0.17 | 0.16 | 0.22*** | 0.15*** | 0.12*** | 0.34*** | 0.23*** | 0.22*** | 0.19 | 0.12 | 0.09 |
| **Unexplained** | -0.11*** | -0.07 | -0.06 | -0.01 | -0.04* | -0.03 | -0.11*** | -0.07*** | -0.06* | 0.00 | -0.05 | -0.05 |
|  |  |  |  |  |  |  |  |  |  |  |  |  |
| Age | -0.02 | 0.02 | 0.03 | 0.04** | 0.03** | 0.02* | -0.04 | 0.03 | 0.06 | 0.02 | 0.01 | 0.01 |
| Vocational degree | 0.05*** | 0.02 | 0.01 | 0.02** | 0.01* | 0.00 | 0.05*** | 0.02** | 0.00 | 0.02 | 0.02 | 0.01 |
| University degree | 0.03*** | 0.03 | 0.03 | 0.03*** | 0.03*** | 0.03*** | 0.05*** | 0.02*** | 0.03*** | 0.03 | 0.03 | 0.03 |
| Good health | -0.00 | -0.00 | -0.00 | -0.00 | -0.00 | -0.00 | -0.00 | -0.00 | -0.00* | 0.00 | -0.00 | -0.00 |
| In education | 0.09*** | 0.02 | -0.00 | 0.06*** | 0.02*** | 0.00 | 0.10*** | 0.02*** | 0.00 | 0.05 | 0.01 | 0.00 |
| Firm size 21–200 | 0.00 | 0.00 | 0.00 | 0.00 | 0.00 | 0.00 | 0.00 | 0.00 | -0.00 | 0.00 | 0.00 | -0.00 |
| Firm size 201–2,000 | -0.00 | -0.00 | -0.00 | 0.00 | 0.00 | 0.00 | 0.00 | 0.00 | 0.00 | 0.00 | 0.00 | 0.00 |
| Firm size 2,001+ | 0.00 | 0.00 | 0.00 | 0.00 | 0.00 | 0.00 | -0.00 | -0.00 | -0.00 | 0.00 | 0.00 | 0.00 |
| Children 0–2 | -0.00 | -0.00 | -0.00 | -0.00 | 0.00 | 0.00 | -0.00 | -0.00* | -0.01** | 0.00 | 0.00 | -0.00 |
| Children 3–17 | 0.00 | -0.00 | -0.00 | 0.00 | 0.00 | -0.00 | -0.00 | 0.00 | 0.00 | 0.01 | 0.00 | -0.00 |
| Married | 0.00 | 0.00 | -0.00 | -0.00 | -0.00 | 0.00 | 0.05*** | 0.04*** | 0.02** | -0.00 | -0.00 | -0.00 |
| Work experience | 0.11*** | 0.07 | 0.08 | 0.05*** | 0.03*** | 0.03** | 0.09** | 0.06* | 0.07* | 0.04 | 0.01 | 0.01 |
| Skilled worker level | 0.00 | -0.00 | -0.00 | 0.02** | 0.01 | 0.01 | -0.01 | -0.02*** | -0.00 | 0.01 | -0.01 | -0.01 |
| Specialist/expert level | 0.02** | 0.02 | 0.03 | -0.01 | 0.02* | 0.02*** | 0.04** | 0.07*** | 0.05*** | -0.01 | 0.02 | 0.03 |
| Number of observations | 4,910 | 4,910 | 4,910 | 2,711 | 2,711 | 2,711 | 5,128 | 5,128 | 5,128 | 2,946 | 2,946 | 2,946 |

Note: Reference categories: no degree, no child under 18 in household, firm size ≤20, unskilled worker level. All models include year fixed effects. *** p<0.01, ** p<0.05, * p<0.1. Source: SOEP v40, own calculations.

**Table A2. Robustness check: gross hourly wages**

Summary decomposition results using log gross hourly wages as dependent variable. SOEP 2013–2023.

|  | **Women** | | | | | | **Men** | | | | | |
| --- | --- | --- | --- | --- | --- | --- | --- | --- | --- | --- | --- | --- |
|  | **All ages** | | | **18–35** | | | **All ages** | | | **18–35** | | |
|  | 25th | 50th | 75th | 25th | 50th | 75th | 25th | 50th | 75th | 25th | 50th | 75th |
| **Difference** | 0.22 | 0.17 | 0.13 | 0.23*** | 0.17*** | 0.12*** | 0.31*** | 0.20*** | 0.16*** | 0.26*** | 0.11 | 0.05* |
| **Explained** | 0.37 | 0.25 | 0.20 | 0.23*** | 0.20*** | 0.19*** | 0.42*** | 0.28*** | 0.26*** | 0.20*** | 0.17 | 0.13*** |
| **Unexplained** | -0.14 | -0.08 | -0.07 | -0.00 | -0.04* | -0.07** | -0.11*** | -0.07*** | -0.09** | 0.06* | -0.06 | -0.08*** |

Note: Reference categories: no degree, no child under 18 in household, firm size ≤20, unskilled worker level. All models include year fixed effects. *** p<0.01, ** p<0.05, * p<0.1. Source: SOEP v40, own calculations.

**Table A3. Robustness check: controlling for detailed occupation**

Summary decomposition results with two-digit occupational categories (KldB 2010) added. SOEP 2013–2023.

|  | **Women** | | | | | | **Men** | | | | | | |
| --- | --- | --- | --- | --- | --- | --- | --- | --- | --- | --- | --- | --- | --- |
|  | **All ages** | | | **18–35** | | | **All ages** | | | **18–35** | | | |
|  | 25th | 50th | 75th | 25th | 50th | 75th | 25th | 50th | 75th | 25th | 50th | 75th |
| **Difference** | **0.17** | **0.10** | **0.10** | **0.21***** | **0.11***** | **0.09***** | **0.23***** | **0.16***** | **0.16***** | **0.20** | **0.07** | **0.03** |
| **Explained** | **0.28** | **0.17** | **0.16** | **0.22***** | **0.15***** | **0.12***** | **0.34***** | **0.24***** | **0.22***** | **0.19** | **0.12** | **0.09** |
| **Unexplained** | **−0.11** | **−0.07** | **−0.06** | **−0.01** | **−0.04*** | **−0.03** | **−0.11***** | **−0.07***** | **−0.05*** | **0.00** | **−0.05** | **−0.05** |

Note: Reference categories: no degree, no child under 18 in household, firm size ≤20, unskilled worker level. All models include year fixed effects. *** p<0.01, ** p<0.05, * p<0.1. Source: SOEP v40, own calculations.

**Table A4. Robustness check: controlling for federal state**

Summary decomposition results with Bundesland indicators added. SOEP 2013–2023.

|  | **Women** | | | | | | **Men** | | | | | | |
| --- | --- | --- | --- | --- | --- | --- | --- | --- | --- | --- | --- | --- | --- |
|  | **All ages** | | | **18–35** | | | **All ages** | | | **18–35** | | | |
|  | 25th | 50th | 75th | 25th | 50th | 75th | 25th | 50th | 75th | 25th | 50th | 75th |
| **Difference** | **0.17** | **0.10** | **0.10** | **0.21***** | **0.11***** | **0.09***** | **0.23***** | **0.16***** | **0.16***** | **0.20** | **0.07** | **0.03** |
| **Explained** | **0.25** | **0.15** | **0.13** | **0.21***** | **0.11***** | **0.09***** | **0.29***** | **0.21***** | **0.20***** | **0.18** | **0.08** | **0.06** |
| **Unexplained** | **−0.08** | **−0.05** | **−0.03** | **−0.00** | **0.00** | **−0.00** | **−0.06*** | **−0.05*** | **−0.04** | **0.02** | **−0.02** | **−0.03** |

Note: Reference categories: no degree, no child under 18 in household, firm size ≤20, unskilled worker level. All models include year fixed effects. *** p<0.01, ** p<0.05, * p<0.1. Source: SOEP v40, own calculations.

**Table A5. Robustness check: controlling for firm tenure**

Summary decomposition results with firm tenure added alongside general work experience. SOEP 2013–2023.

|  | **Women** | | | | | | **Men** | | | | | | |
| --- | --- | --- | --- | --- | --- | --- | --- | --- | --- | --- | --- | --- | --- |
|  | **All ages** | | | **18–35** | | | **All ages** | | | **18–35** | | | |
|  | 25th | 50th | 75th | 25th | 50th | 75th | 25th | 50th | 75th | 25th | 50th | 75th |
| **Difference** | **0.16** | **0.10** | **0.10** | **0.21***** | **0.12***** | **0.09***** | **0.23***** | **0.16***** | **0.16***** | **0.20** | **0.07** | **0.03** |
| **Explained** | **0.28** | **0.18** | **0.17** | **0.22***** | **0.15***** | **0.12***** | **0.35***** | **0.25***** | **0.24***** | **0.20** | **0.12** | **0.09** |
| **Unexplained** | **−0.11** | **−0.08** | **−0.07** | **−0.01** | **−0.04*** | **−0.03** | **−0.12***** | **−0.09***** | **−0.07**** | **−0.00** | **−0.05** | **−0.06** |

Note: Reference categories: no degree, no child under 18 in household, firm size ≤20, unskilled worker level. All models include year fixed effects. *** p<0.01, ** p<0.05, * p<0.1. Source: SOEP v40, own calculations.
